# Supplementary material for: The CENP-O complex requirement varies among different cell types
Source: PubMed Central journal article supplement (PMC4129241; doi:10.1007/s10577-014-9404-1), 2014-01-31

## Supplementary Figure legends

### Supplementary Figure S1. Generating mice with CENP-U conditional alleles

- (A) Targeting construct for creating CENP-U<sup>LF</sup> alleles in mouse ES cells.
- (B) Restriction analysis of genomic DNA from ES cells with CENP-U<sup>LF</sup> alleles. DNA was digested with Hind III, and a novel 10-kb fragment was detected with a probe indicated in (A) if a CENP-U<sup>LF</sup> allele was created.
- (C) Strategy for generating conditional CENP-U-deficient mice. Mice with CENP-U<sup>flox/+</sup> alleles were generated from ES cells with these alleles. Then, the CENP-U<sup>flox/flox</sup> mice were obtained by intercrossing with the CENP-U<sup>flox/+</sup> mice. The ERT2-Cre gene was integrated into the CENP-U<sup>+/-</sup> mice (Figure 1). Finally, the CENP-U<sup>flox/-</sup> mice with ERT2-Cre genes were obtained by crosses with the CENP-U<sup>flox/flox</sup> mice and CENP-U<sup>+/-</sup> mice with ERT2-Cre genes.
- (D) PCR genotyping for distinguishing between wild-type CENP-U (WT), CENP-U-disrupted (KO), and CENP-U flox alleles. (a) Primer design. (b) PCR results with DNA from mice with the indicated alleles.
- (E) Immunofluorescence analysis using anti-CENP-U antibody for MEF cells from CENP-U<sup>flox/-</sup> mice. CENP-U signals were not detected in the presence of OHT. Bar, 10  $\mu$ m.

## Supplementary Movie legends

### Supplementary Movie1

Chromosome dynamics in CENP-U-deficient ES cells observed by time-lapse microscopy. Selected images were used in Figure 4A-(a).

### Supplementary Movie2

Chromosome dynamics in CENP-U-deficient ES cells observed by time-lapse microscopy. Selected images were used in Figure 4A-(b).

### **Supplementary Movie3**

Chromosome dynamics in CENP-U-deficient ES cells observed by time-lapse microscopy. Selected images were used in Figure 4A-(c).

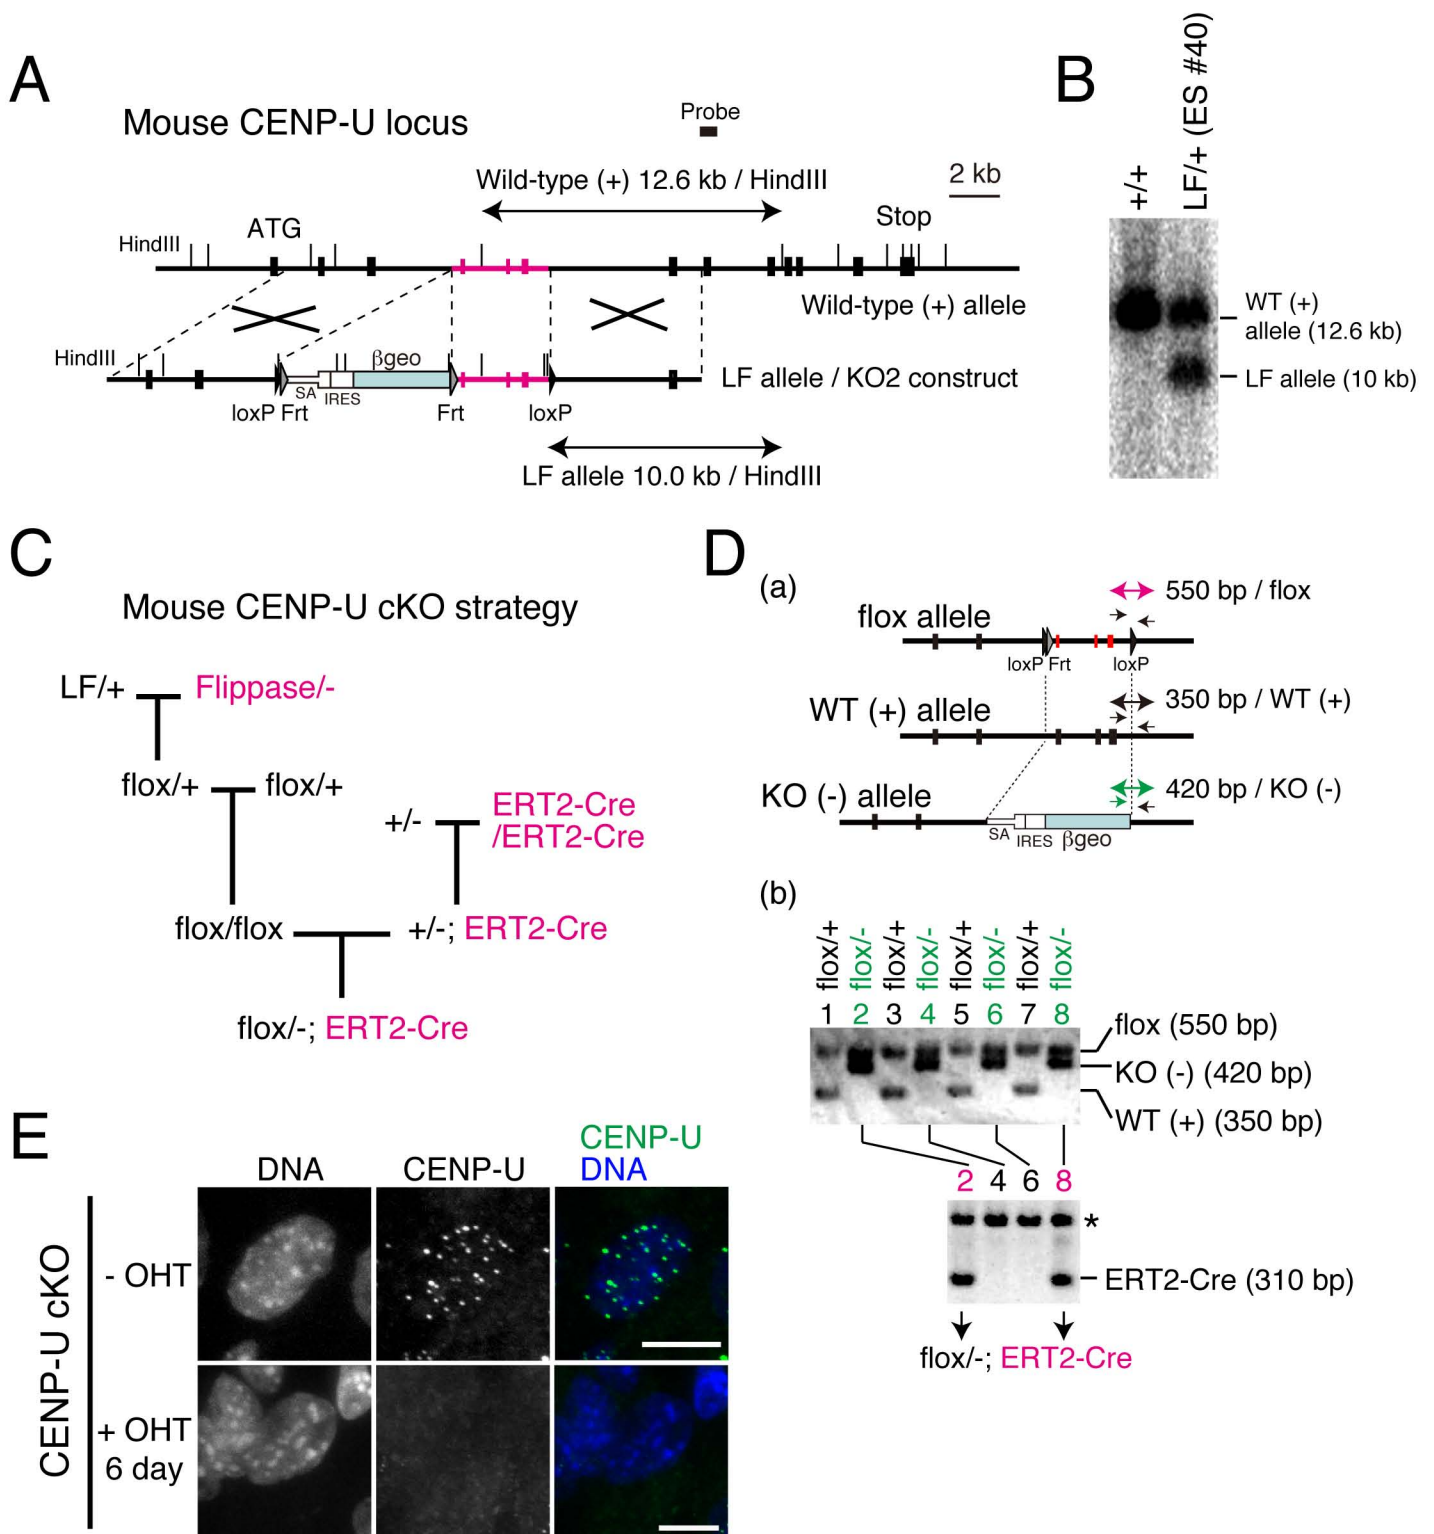

Supplement: 10577_2014_9404_MOESM4_ESM.pdf [file 10577_2014_9404_MOESM4_ESM.pdf]
